# Supplementary material
Source: Copernicus journal article supplement (doi:10.5194/egusphere-2026-2458)
Supplement: Supplementary file 1 [file egusphere-2026-2458-supplement.pdf]

## S1 Methodology

### S1.1 Particle classification thresholds

**Table S1: Initial SPIN OPC parameters used to perform supervised SVM classification where  $x$  is the 1 second averaged particle property with respect to each class.**

| Class        | $\delta_{SPIN}$         | $\log_{10}(I_{size})$   | $S_{liq}$  |
|--------------|-------------------------|-------------------------|------------|
| Aerosol      | $x < 0.16$              | $x \leq 0.125$          | -          |
| Droplet      | $0.16 \leq x \leq 0.35$ | $0.35 \leq x$           | $1 \leq x$ |
| Ice          | $0.4 \leq x$            | $0.4 \leq x$            | -          |
| Water Uptake | $x < 0.35$              | $0.125 \leq x \leq 0.4$ | -          |

## S1 Results

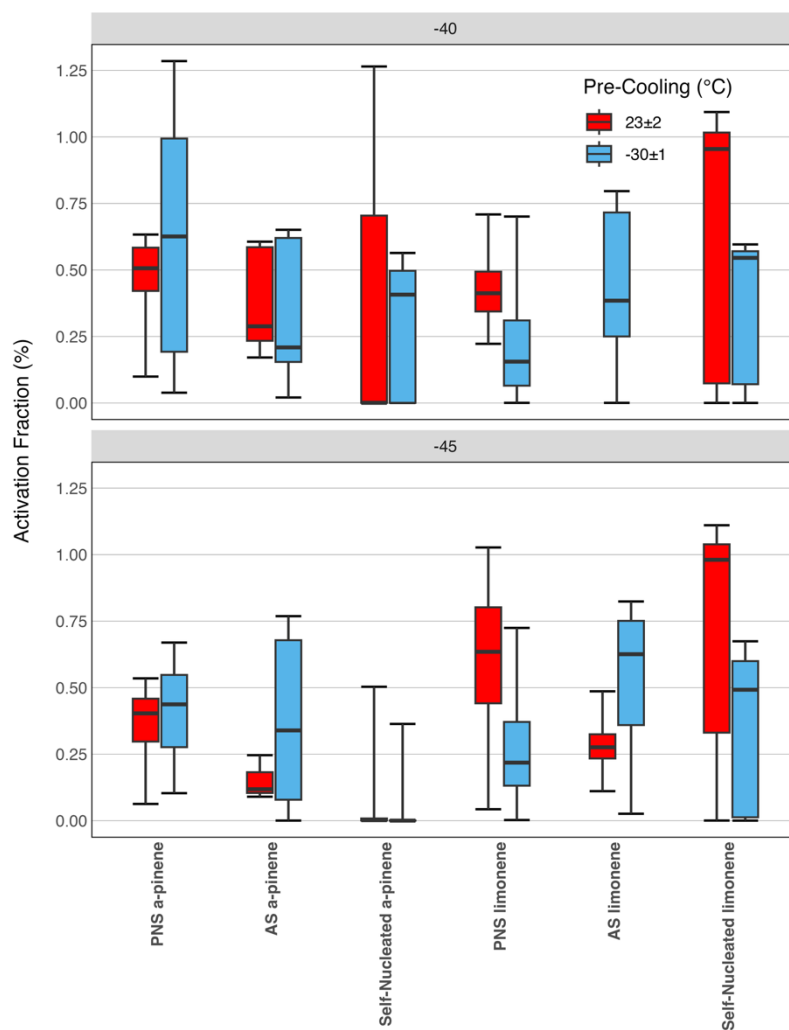

10 **Figure S1 – Boxplot of heterogeneous AFs for each experiment without any smoothing or filtering as described in Sect. 2.6.3. Colors indicate the average pre-cooling temperature of the experiment. Panels are labeled by the average lamina temperature for the experiment. Whiskers are the min and maximum AF for each experiment without any outlier removal to accommodate the bias of AF values of 0 for much of each experiment until critical  $S_{ice}$  was reached.**

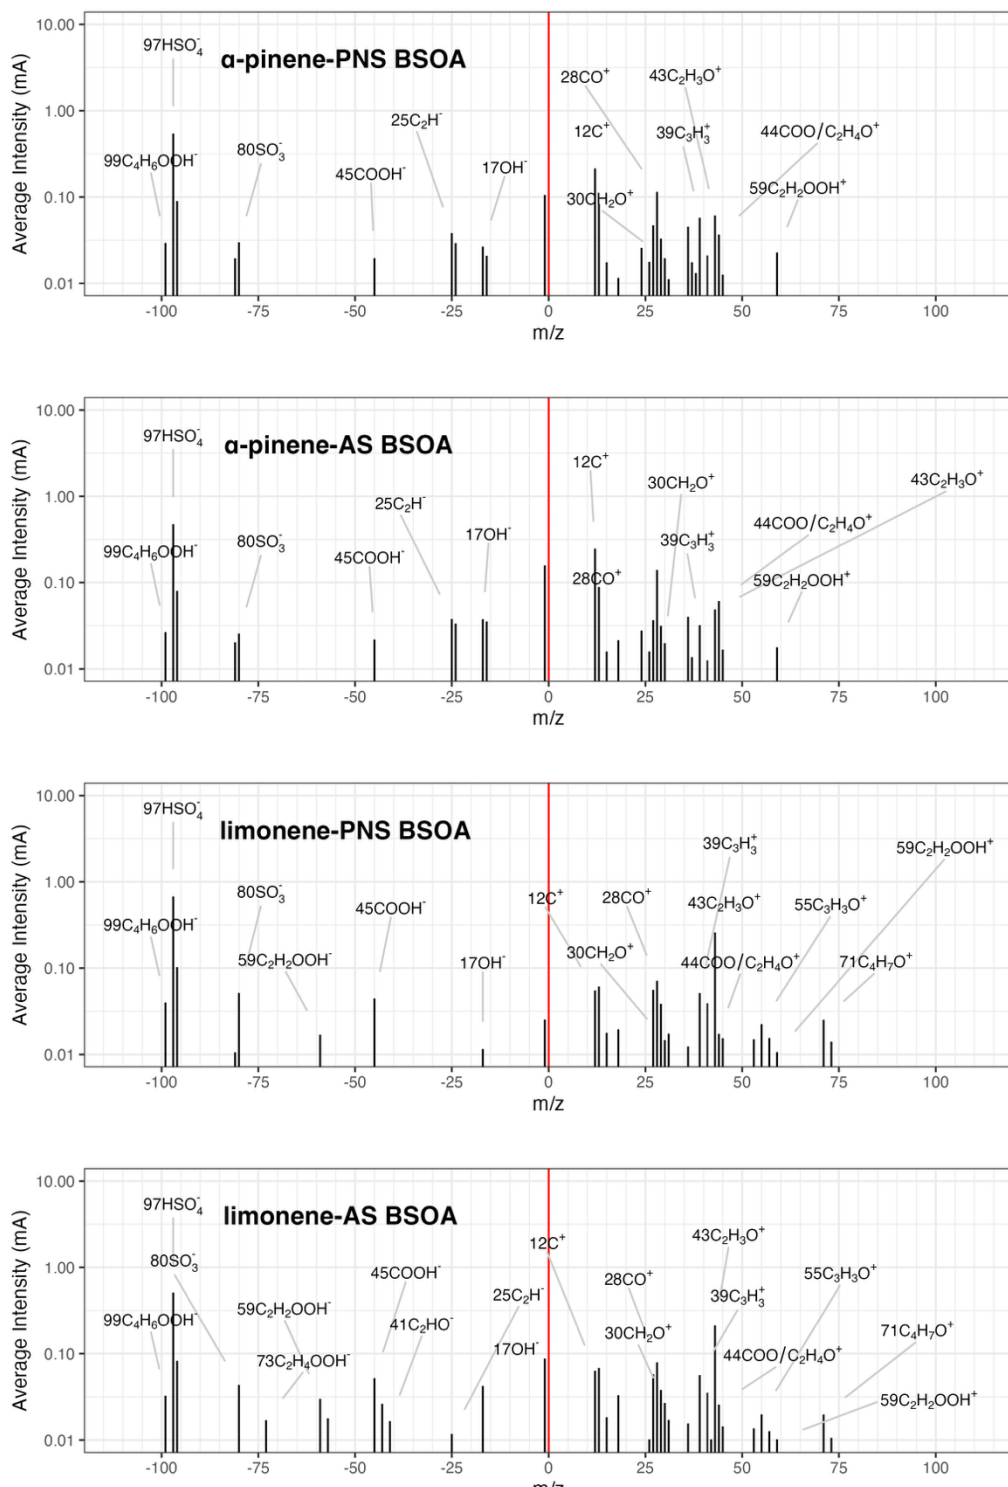

**Figure S2 – Averaged mass spectra for each precursor-seed combination as labeled. Aerosol generation conditions correspond to Table 1. Spectra are plotted in log scale to accommodate the six orders of magnitude in dynamic range for PALMS-NG. Both positive**

15 and negative ions are shown and separated by the red line centered at  $m/z = 0$ . Known PALMS specific ion fragments are labeled as cataloged or previously identified in upper tropospheric measurements (Froyd et al., 2009; Murphy et al., 2006). The following ion fragments are unique to limonene BSOA:  $-59 m/z$  ( $C_2H_2OOH$ ),  $+55 m/z$  ( $C_3H_3O^+$ ), and  $+71 m/z$  ( $C_4H_7O^+$ ). For  $\alpha$ -pinene BSOA,  $+12 m/z$  ( $C^+$ ) was the strongest positive ion fragment followed by  $+28 m/z$  ( $CO^+$ ), with comparable intensities for  $+39$  ( $C_3H_3^+$ ) and  $+43$  ( $C_2H_3O^+$ )  $m/z$ . No unique ion fragments were identified for  $\alpha$ -pinene. A primary difference between  $\alpha$ -pinene and limonene BSOA was the positive ion fragment ratio of 39:43, with seed specific ratios of (AS 0.66, PNS 0.94) and (AS 0.27, PNS 0.20) respectively.

20

25 **Table S2 – A summary of all thermodynamic onsets and corresponding experimental parameters. From left to right: seed particle composition, gas-phase precursor for BSOA generation, SPIN-OPC classification for particle type, number of observations for a given onset, 0.5% AF onset  $S_{ice}$ , onset temperature, geometric mean diameter of the primary particle mode, geometric standard deviation of the primary particle mode, CPC particle concentration larger than 100 nm, BSOA coating thickness when applicable, PCU temperature, PCU RH, PCU inlet RH, percentage of particles that were self-nucleated, and percentage of singlet to doublet particles.**

| Seed | Precursor        | Class        | Obs. | Onset $S_{ice}$ | Onset temperature (°C) | $D_{pg}$ (nm) | $\sigma_g$ | Coating thickness (nm) | CPC ( $n\text{ cm}^{-3}$ ) | PCU temperature (°C) | PCU RH (%) | PCU inlet RH (%) | Self-nucleated organic (%) | Singlet to doublet (%) |
|------|------------------|--------------|------|-----------------|------------------------|---------------|------------|------------------------|----------------------------|----------------------|------------|------------------|----------------------------|------------------------|
| AS   | Seed Only        | Ice          | 3132 | $1.34 \pm 0.08$ | $-44.8 \pm 0.4$        | $288 \pm 0.8$ | 1.08       | -                      | 7356                       | $24.3 \pm 1.0$       | $0 \pm 5$  | $0 \pm 5$        | 0                          | $91 \pm 0.02$          |
| AS   | Seed Only        | Ice          | 1846 | $1.36 \pm 0.08$ | $-39.8 \pm 0.4$        | $286 \pm 0.6$ | 1.08       | -                      | 7485                       | $24.7 \pm 1.0$       | $0 \pm 5$  | $0 \pm 5$        | 0                          | $90 \pm 0.02$          |
| AS   | Seed Only        | Ice          | 455  | $1.53 \pm 0.10$ | $-34.7 \pm 0.5$        | $283 \pm 0.5$ | 1.09       | -                      | 8091                       | $24.8 \pm 1.0$       | $0 \pm 5$  | $0 \pm 5$        | 0                          | $91 \pm 0.02$          |
| AS   | Seed Only        | Droplet      | 308  | $1.54 \pm 0.10$ | $-34.7 \pm 0.5$        | $283 \pm 0.5$ | 1.09       | -                      | 8091                       | $24.8 \pm 1.0$       | $0 \pm 5$  | $0 \pm 5$        | 0                          | $91 \pm 0.02$          |
| AS   | $\alpha$ -pinene | Ice          | 1080 | $1.49 \pm 0.10$ | $-45.2 \pm 0.4$        | $310 \pm 5.7$ | 1.1        | 10                     | 12782                      | $23.3 \pm 1.0$       | $0 \pm 5$  | $0 \pm 5$        | $0 \pm 1$                  | $85 \pm 0.03$          |
| AS   | $\alpha$ -pinene | Ice          | 1290 | $1.44 \pm 0.08$ | $-44.9 \pm 0.4$        | $316 \pm 0.5$ | 1.1        | 19                     | 19086                      | $-29.8 \pm 1.1$      | -          | $0 \pm 5$        | $4 \pm 4$                  | $86 \pm 0.03$          |
| AS   | $\alpha$ -pinene | Ice          | 658  | $1.56 \pm 0.10$ | $-40.3 \pm 0.4$        | $303 \pm 0.0$ | 1.09       | 6                      | 9533                       | $22.1 \pm 1.0$       | $0 \pm 5$  | $0 \pm 5$        | $0 \pm 0$                  | $89 \pm 0.02$          |
| AS   | $\alpha$ -pinene | Ice          | 1106 | $1.46 \pm 0.09$ | $-40.2 \pm 0.4$        | $317 \pm 4.3$ | 1.11       | 20                     | 13241                      | $22.0 \pm 1.0$       | $0 \pm 5$  | $0 \pm 5$        | $1 \pm 1$                  | $84 \pm 0.03$          |
| AS   | $\alpha$ -pinene | Ice          | 1056 | $1.41 \pm 0.09$ | $-39.9 \pm 0.4$        | $318 \pm 0.7$ | 1.11       | 21                     | 20885                      | $-29.8 \pm 1.1$      | -          | $0 \pm 5$        | $12 \pm 6$                 | $85 \pm 0.05$          |
| AS   | $\alpha$ -pinene | Droplet      | 108  | $1.55 \pm 0.10$ | $-40.4 \pm 0.5$        | $303 \pm 0.0$ | 1.09       | 6                      | 9533                       | $22.1 \pm 1.0$       | $0 \pm 5$  | $0 \pm 5$        | $0 \pm 0$                  | $89 \pm 0.02$          |
| AS   | $\alpha$ -pinene | Droplet      | 575  | $1.60 \pm 0.11$ | $-35.2 \pm 0.5$        | $313 \pm 9.2$ | 1.11       | 18                     | 11518                      | $21.5 \pm 1.0$       | $0 \pm 5$  | $0 \pm 5$        | $0 \pm 2$                  | $84 \pm 0.02$          |
| AS   | $\alpha$ -pinene | Water Uptake | 282  | $1.48 \pm 0.09$ | $-45.2 \pm 0.4$        | $310 \pm 5.7$ | 1.1        | 10                     | 12782                      | $23.3 \pm 1.0$       | $0 \pm 5$  | $0 \pm 5$        | $0 \pm 1$                  | $85 \pm 0.03$          |
| AS   | $\alpha$ -pinene | Water Uptake | 170  | $1.48 \pm 0.09$ | $-45.1 \pm 0.4$        | $316 \pm 0.5$ | 1.1        | 19                     | 19086                      | $-29.8 \pm 1.1$      | -          | $0 \pm 5$        | $4 \pm 4$                  | $86 \pm 0.03$          |
| AS   | $\alpha$ -pinene | Water Uptake | 184  | $1.48 \pm 0.09$ | $-40.4 \pm 0.4$        | $303 \pm 0.0$ | 1.09       | 6                      | 9533                       | $22.1 \pm 1.0$       | $0 \pm 5$  | $0 \pm 5$        | $0 \pm 0$                  | $89 \pm 0.02$          |
| AS   | $\alpha$ -pinene | Water Uptake | 105  | $1.41 \pm 0.08$ | $-40.1 \pm 0.4$        | $317 \pm 4.3$ | 1.11       | 20                     | 13241                      | $22.0 \pm 1.0$       | $0 \pm 5$  | $0 \pm 5$        | $1 \pm 1$                  | $84 \pm 0.03$          |

|     |                  |              |      |             |             |           |      |    |       |             |       |       |         |           |
|-----|------------------|--------------|------|-------------|-------------|-----------|------|----|-------|-------------|-------|-------|---------|-----------|
| AS  | $\alpha$ -pinene | Water Uptake | 326  | 1.32 ± 0.07 | -39.9 ± 0.4 | 318 ± 0.7 | 1.11 | 21 | 20885 | -29.8 ± 1.1 | -     | 0 ± 5 | 12 ± 6  | 85 ± 0.05 |
| AS  | limonene         | Ice          | 1549 | 1.46 ± 0.09 | -44.8 ± 0.4 | 314 ± 2.8 | 1.1  | 18 | 18532 | 24.3 ± 1.0  | 0 ± 5 | 0 ± 5 | 0 ± 1   | 89 ± 0.06 |
| AS  | limonene         | Ice          | 2179 | 1.36 ± 0.08 | -44.7 ± 0.4 | 318 ± 2.0 | 1.11 | 21 | 17217 | -30.8 ± 1.1 | -     | 0 ± 5 | 1 ± 2   | 87 ± 0.06 |
| AS  | limonene         | Ice          | 1204 | 1.34 ± 0.07 | -39.6 ± 0.4 | 325 ± 1.2 | 1.11 | 27 | 18356 | -30.5 ± 1.1 | -     | 0 ± 5 | 2 ± 2   | 87 ± 0.09 |
| PNS | Seed Only        | Ice          | 1528 | 1.47 ± 0.10 | -44.4 ± 0.5 | 297 ± 0.4 | 1.08 | -  | 5879  | 24.3 ± 1.0  | 0 ± 5 | 0 ± 5 | 0       | 89 ± 0.01 |
| PNS | Seed Only        | Ice          | 909  | 1.48 ± 0.10 | -39.4 ± 0.5 | 298 ± 0.8 | 1.08 | -  | 5466  | 23.6 ± 1.0  | 0 ± 5 | 0 ± 5 | 0       | 90 ± 0.01 |
| PNS | Seed Only        | Droplet      | 593  | 1.54 ± 0.11 | -34.4 ± 0.5 | 299 ± 1.1 | 1.08 | -  | 5364  | 23.6 ± 1.0  | 0 ± 5 | 1 ± 5 | 0       | 90 ± 0.01 |
| PNS | $\alpha$ -pinene | Ice          | 1307 | 1.47 ± 0.09 | -44.8 ± 0.4 | 328 ± 2.0 | 1.13 | 30 | 20808 | 20.5 ± 1.0  | 0 ± 5 | 0 ± 5 | 15 ± 7  | 86 ± 0.03 |
| PNS | $\alpha$ -pinene | Ice          | 1313 | 1.47 ± 0.09 | -45.0 ± 0.4 | 318 ± 0.7 | 1.11 | 21 | 17169 | -29.9 ± 1.1 | -     | 0 ± 5 | 13 ± 3  | 87 ± 0.02 |
| PNS | $\alpha$ -pinene | Ice          | 1194 | 1.41 ± 0.08 | -39.9 ± 0.4 | 331 ± 1.3 | 1.12 | 34 | 19689 | 23.3 ± 1.0  | 0 ± 5 | 0 ± 5 | 27 ± 2  | 86 ± 0.03 |
| PNS | $\alpha$ -pinene | Ice          | 1259 | 1.39 ± 0.08 | -39.7 ± 0.4 | 321 ± 6.7 | 1.11 | 22 | 24062 | -29.7 ± 1.1 | -     | 0 ± 5 | 44 ± 24 | 86 ± 0.03 |
| PNS | $\alpha$ -pinene | Water Uptake | 416  | 1.45 ± 0.09 | -45.0 ± 0.4 | 318 ± 0.7 | 1.11 | 21 | 17169 | -29.9 ± 1.1 | -     | 0 ± 5 | 13 ± 3  | 87 ± 0.02 |
| PNS | $\alpha$ -pinene | Water Uptake | 261  | 1.37 ± 0.08 | -40.1 ± 0.4 | 331 ± 1.3 | 1.12 | 34 | 19689 | 23.3 ± 1.0  | 0 ± 5 | 0 ± 5 | 27 ± 2  | 86 ± 0.03 |
| PNS | $\alpha$ -pinene | Water Uptake | 287  | 1.31 ± 0.07 | -40.0 ± 0.4 | 321 ± 6.7 | 1.11 | 22 | 24062 | -29.7 ± 1.1 | -     | 0 ± 5 | 44 ± 24 | 86 ± 0.03 |
| PNS | $\alpha$ -pinene | Water Uptake | 322  | 1.26 ± 0.07 | -34.8 ± 0.4 | 316 ± 7.7 | 1.11 | 18 | 28927 | -29.4 ± 1.1 | -     | 0 ± 5 | 27 ± 12 | 78 ± 0.03 |
| PNS | limonene         | Ice          | 1890 | 1.37 ± 0.08 | -44.7 ± 0.4 | 311 ± 2.6 | 1.09 | 12 | 11687 | -           | -     | -     | 0 ± 0   | 91 ± 0.05 |
| PNS | limonene         | Ice          | 1983 | 1.43 ± 0.08 | -44.7 ± 0.4 | 325 ± 2.2 | 1.12 | 28 | 16098 | -31.6 ± 1.1 | -     | 0 ± 5 | 0 ± 2   | 89 ± 0.11 |
| PNS | limonene         | Ice          | 1207 | 1.40 ± 0.08 | -39.7 ± 0.4 | 327 ± 2.3 | 1.12 | 30 | 15095 | 24.8 ± 1.0  | 0 ± 5 | 0 ± 5 | 1 ± 5   | 87 ± 0.05 |
| PNS | limonene         | Ice          | 1091 | 1.38 ± 0.08 | -39.8 ± 0.4 | 322 ± 1.7 | 1.11 | 24 | 15616 | -30.9 ± 1.1 | -     | 0 ± 5 | 0 ± 1   | 87 ± 0.06 |
| PNS | limonene         | Droplet      | 223  | 1.61 ± 0.11 | -34.8 ± 0.5 | 326 ± 5.4 | 1.12 | 29 | 16352 | -30.8 ± 1.1 | -     | 0 ± 5 | 0 ± 2   | 88 ± 0.07 |
| -   | $\alpha$ -pinene | Ice          | 1164 | 1.48 ± 0.09 | -44.8 ± 0.4 | 85 ± 6.9  | 1.39 | -  | 14817 | 24.0 ± 1.1  | 0 ± 5 | 0 ± 5 | 100     | -         |
| -   | $\alpha$ -pinene | Ice          | 524  | 1.44 ± 0.09 | -44.7 ± 0.4 | 89 ± 3.1  | 1.58 | -  | 27444 | -30.8 ± 1.1 | -     | 0 ± 5 | 100     | -         |
| -   | $\alpha$ -pinene | Ice          | 1013 | 1.40 ± 0.08 | -40.0 ± 0.4 | 88 ± 7.7  | 1.25 | -  | 12620 | 22.4 ± 1.1  | 0 ± 5 | 0 ± 5 | 100     | -         |

|   |                  |              |      |             |             |          |      |   |       |             |       |       |     |   |
|---|------------------|--------------|------|-------------|-------------|----------|------|---|-------|-------------|-------|-------|-----|---|
| - | $\alpha$ -pinene | Ice          | 1020 | 1.39 ± 0.09 | -40.1 ± 0.4 | 88 ± 6.1 | 1.54 | - | 25480 | -30.3 ± 1.1 | -     | 0 ± 5 | 100 | - |
| - | $\alpha$ -pinene | Droplet      | 650  | 1.48 ± 0.10 | -34.8 ± 0.5 | 90 ± 8.4 | 1.27 | - | 15336 | 22.0 ± 1.1  | 0 ± 5 | 0 ± 5 | 100 | - |
| - | $\alpha$ -pinene | Water Uptake | 495  | 1.40 ± 0.08 | -44.8 ± 0.4 | 85 ± 6.9 | 1.39 | - | 14817 | 24.0 ± 1.1  | 0 ± 5 | 0 ± 5 | 100 | - |
| - | $\alpha$ -pinene | Water Uptake | 790  | 1.26 ± 0.07 | -39.8 ± 0.4 | 88 ± 7.7 | 1.25 | - | 12620 | 22.4 ± 1.1  | 0 ± 5 | 0 ± 5 | 100 | - |
| - | $\alpha$ -pinene | Water Uptake | 128  | 1.41 ± 0.08 | -39.9 ± 0.4 | 88 ± 6.1 | 1.54 | - | 25480 | -30.3 ± 1.1 | -     | 0 ± 5 | 100 | - |
| - | $\alpha$ -pinene | Water Uptake | 517  | 1.26 ± 0.07 | -34.8 ± 0.4 | 90 ± 8.4 | 1.27 | - | 15336 | 22.0 ± 1.1  | 0 ± 5 | 0 ± 5 | 100 | - |
| - | limonene         | Ice          | 2564 | 1.28 ± 0.07 | -44.8 ± 0.3 | 72 ± 4.3 | 1.27 | - | 14800 | 24.0 ± 1.0  | 0 ± 5 | 0 ± 5 | 100 | - |
| - | limonene         | Ice          | 2196 | 1.31 ± 0.07 | -44.7 ± 0.4 | 92 ± 4.4 | 1.26 | - | 24242 | -30.2 ± 1.1 | -     | 0 ± 5 | 100 | - |
| - | limonene         | Ice          | 1593 | 1.29 ± 0.07 | -39.7 ± 0.4 | 77 ± 9.5 | 1.24 | - | 16995 | 23.8 ± 1.0  | 0 ± 5 | 0 ± 5 | 100 | - |
| - | limonene         | Ice          | 1500 | 1.27 ± 0.07 | -39.8 ± 0.3 | 99 ± 0.0 | 1.17 | - | 26227 | -30.3 ± 1.1 | -     | 0 ± 5 | 100 | - |

**Table S3 – Chemical formulas of organosulfate compounds detected in coating experiments using VIA-Vocus-CIMS**

| (amu) | $\alpha$ -Pinene-AS BSOA                         | $\alpha$ -Pinene-PNS BSOA                       | Limonene-AS BSOA                                                                                   | Limonene-PNS BSOA                                             |
|-------|--------------------------------------------------|-------------------------------------------------|----------------------------------------------------------------------------------------------------|---------------------------------------------------------------|
| 388   | –                                                | –                                               | –                                                                                                  | C <sub>17</sub> H <sub>24</sub> O <sub>6</sub> S <sub>2</sub> |
| 374   | –                                                | –                                               | –                                                                                                  | C <sub>12</sub> H <sub>22</sub> O <sub>9</sub> S <sub>2</sub> |
| 332   | –                                                | –                                               | –                                                                                                  | C <sub>15</sub> H <sub>24</sub> O <sub>4</sub> S <sub>2</sub> |
| 320   | –                                                | –                                               | –                                                                                                  | C <sub>11</sub> H <sub>12</sub> O <sub>9</sub> S              |
| 312   | –                                                | –                                               | C <sub>15</sub> H <sub>20</sub> O <sub>5</sub> S                                                   | –                                                             |
| 298   | C <sub>13</sub> H <sub>14</sub> O <sub>6</sub> S | –                                               | –                                                                                                  | –                                                             |
| 265   | –                                                | C <sub>8</sub> H <sub>9</sub> O <sub>8</sub> S  | –                                                                                                  | –                                                             |
| 246   | –                                                | –                                               | –                                                                                                  | C <sub>9</sub> H <sub>10</sub> O <sub>6</sub> S               |
| 244   | –                                                | –                                               | C <sub>8</sub> H <sub>20</sub> O <sub>6</sub> S                                                    | –                                                             |
| 240   | C <sub>8</sub> H <sub>16</sub> O <sub>6</sub> S  | C <sub>8</sub> H <sub>16</sub> O <sub>6</sub> S | C <sub>8</sub> H <sub>16</sub> O <sub>6</sub> S                                                    | –                                                             |
| 238   | –                                                | –                                               | –                                                                                                  | C <sub>9</sub> H <sub>18</sub> O <sub>5</sub> S               |
| 234   | –                                                | –                                               | C <sub>10</sub> H <sub>18</sub> O <sub>4</sub> S; C <sub>11</sub> H <sub>22</sub> O <sub>3</sub> S | –                                                             |
| 226   | –                                                | –                                               | –                                                                                                  | C <sub>8</sub> H <sub>18</sub> O <sub>5</sub> S               |
| 196   | –                                                | –                                               | C <sub>10</sub> H <sub>12</sub> O <sub>2</sub> S                                                   | C <sub>6</sub> H <sub>12</sub> O <sub>5</sub> S               |
| 166   | –                                                | –                                               | –                                                                                                  | C <sub>6</sub> H <sub>14</sub> O <sub>3</sub> S               |
| 162   | –                                                | –                                               | –                                                                                                  | C <sub>7</sub> H <sub>14</sub> O <sub>2</sub> S               |
| 148   | –                                                | –                                               | –                                                                                                  | C <sub>6</sub> H <sub>12</sub> O <sub>2</sub> S               |

### limonene-derived BSOA

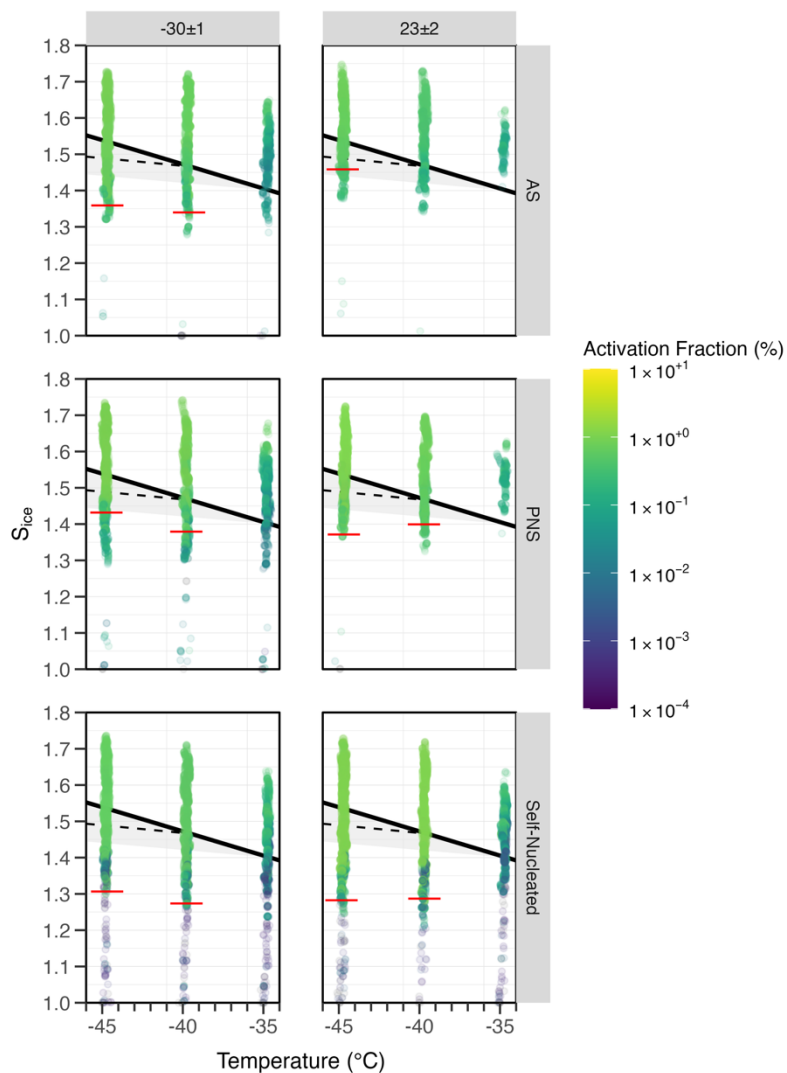

30 **Figure S3 – Activated fractions of limonene-derived BSOA as a function of temperature and  $S_{ice}$ . These include all OPC classes. Panel labels indicate pre-cooling temperature (top) or whether a seed was present (right). In each panel, solid black line represents water saturation, dashed black line is the homogeneous freezing threshold of 100 nm diameter solution droplets as defined by (Koop et al., 2000), with uncertainty in water activity ( $a_w$ ) of  $\pm 2.5\%$  represented by the gray shaded region (Koop, 2004). Red horizontal lines are the 0.5% ice onsets reported.**

35

$\alpha$ -pinene-derived BSOA

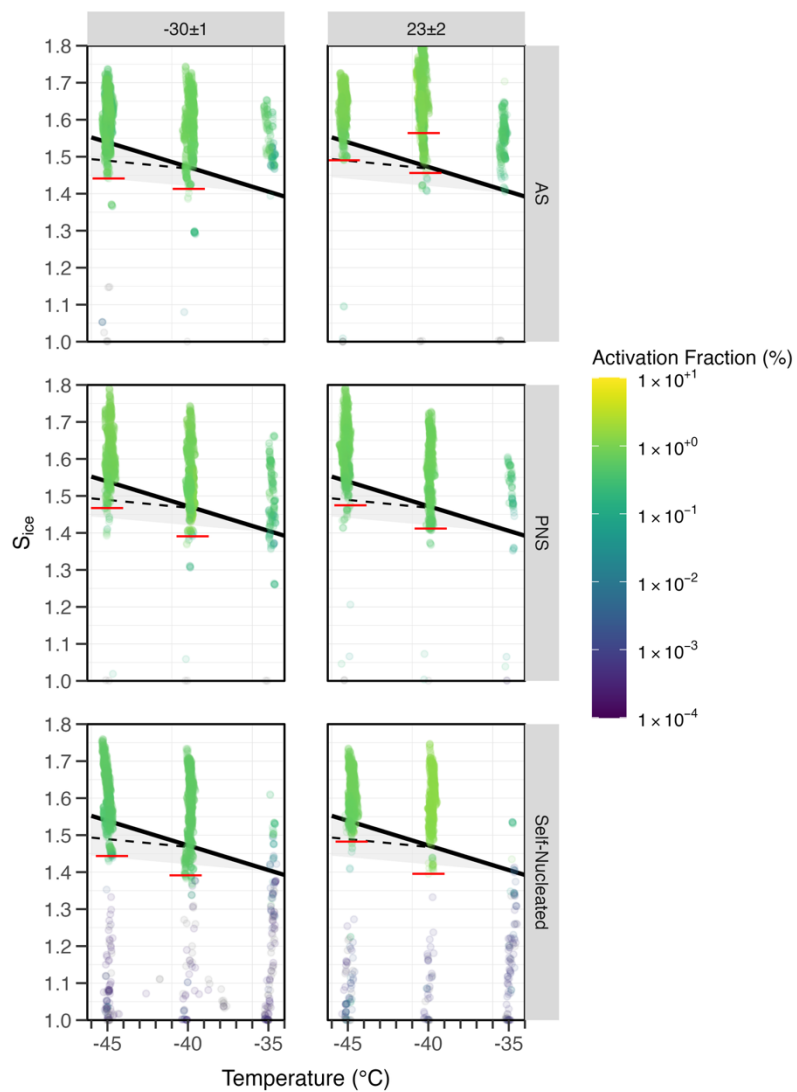

Figure S4 – Activated fractions of  $\alpha$ -pinene-derived BSOA as a function of temperature and  $S_{ice}$ . Panel structure is identical to Figure S3.

## S1 References

- Froyd, K. D., Murphy, D. M., Sanford, T. J., Thomson, D. S., Wilson, J. C., Pfister, L., and Lait, L.: Aerosol composition of the tropical upper troposphere, *Atmos. Chem. Phys.*, 9, 4363–4385, <https://doi.org/10.5194/acp-9-4363-2009>, 2009.
- 45 Lambe, A. T., Ahern, A. T., Williams, L. R., Slowik, J. G., Wong, J. P. S., Abbatt, J. P. D., Brune, W. H., Ng, N. L., Wright, J. P., Croasdale, D. R., Worsnop, D. R., Davidovits, P., and Onasch, T. B.: Characterization of aerosol photooxidation flow reactors: heterogeneous oxidation, secondary organic aerosol formation and cloud condensation nuclei activity measurements, *Atmos. Meas. Tech.*, 4, 445–461, <https://doi.org/10.5194/amt-4-445-2011>, 2011.
- 50 Murphy, D. M., Cziczo, D. J., Froyd, K. D., Hudson, P. K., Matthew, B. M., Middlebrook, A. M., Peltier, R. E., Sullivan, A., Thomson, D. S., and Weber, R. J.: Single-particle mass spectrometry of tropospheric aerosol particles, *J. Geophys. Res.*, 111, 2006JD007340, <https://doi.org/10.1029/2006JD007340>, 2006.
